# Supplementary material for: Chronic nicotinamide mononucleotide supplementation elevates blood nicotinamide adenine dinucleotide levels and alters muscle function in healthy older men
Source: PubMed Central journal article supplement (PMC9158788; doi:10.1038/s41514-022-00084-z), 2022-05-01
Supplement: 41514_2022_84_MOESM1_ESM.pdf [file 41514_2022_84_MOESM1_ESM.pdf]

### Supplementary Table 1.

**Clinical characteristics of the 20 study participants who completed the 12-week study prior to NMN supplementation, Related to Table 1.**

|                                            | Placebo Mean±SD (10) | NMN Mean±SD (10) | Between group p-value |
|--------------------------------------------|----------------------|------------------|-----------------------|
| Age (year)                                 | 70.1±5.6             | 69.8±2.6         | 0.520 <sup>b</sup>    |
| BMI (kg/m <sup>2</sup> )                   | 24.8±1.2             | 23.7±1.3         | 0.063 <sup>a</sup>    |
| Fat Mass (%)                               | 26.8±4.4             | 25.1±3.2         | 0.343 <sup>a</sup>    |
| SMI (kg/m <sup>2</sup> )                   | 7.79±0.44            | 7.65±0.39        | 0.459 <sup>a</sup>    |
| Gait Speed (m/s)                           | 1.31±0.19            | 1.50±0.20        | 0.041 <sup>a*</sup>   |
| A 30-s Chair-Stand Test<br>(Counts/30s)    | 13.5±5.2             | 14.8±4.0         | 0.539 <sup>a</sup>    |
| Right hand grip strength (kg)              | 36.0±7.1             | 40.1±3.2         | 0.147 <sup>b</sup>    |
| Left hand grip strength (kg)               | 34.8±4.8             | 36.1±5.6         | 0.587 <sup>a</sup>    |
| HbA1c (%)                                  | 5.74±0.32            | 5.85±0.58        | 0.939 <sup>b</sup>    |
| FBG (mg/dL)                                | 94.4±7.8             | 99.0±9.0         | 0.236 <sup>a</sup>    |
| HOMA-IR                                    | 1.08±0.38            | 1.35±0.79        | 0.684 <sup>b</sup>    |
| CT L/S ratio                               | 1.15±0.11            | 1.15±0.12        | 0.943 <sup>a</sup>    |
| Visceral adipose tissue (cm <sup>2</sup> ) | 126.3±38.1           | 129.3±45.8       | 0.874 <sup>a</sup>    |

The mean and standard deviation of data from 20 participants (from the NMN group (n = 10) and placebo group (n = 10)) are presented.

a. Inter-group comparisons were performed using an unpaired t-test.

b. Inter-group comparisons were performed using the Mann–Whitney *U* test.

\*P<0.05

**Supplementary Table 2.**  
**The effect of NMN on clinical laboratory data (hematology and CRP).**

|                                       | Placebo Mean±SD                      | NMN Mean±SD                          | p-value                                                   |                                  | Placebo Mean±SD                    | NMN Mean±SD                        | p-value                                                   |
|---------------------------------------|--------------------------------------|--------------------------------------|-----------------------------------------------------------|----------------------------------|------------------------------------|------------------------------------|-----------------------------------------------------------|
| WBC (x10 <sup>3</sup> counts/μL)      |                                      |                                      |                                                           | RBC (x10 <sup>3</sup> counts/μL) |                                    |                                    |                                                           |
| Baseline                              | 6.96±1.34 (21)<br>6.86±1.40 (10)     | 6.13±1.48 (21)<br>5.60±1.32 (10)     | 0.019 <sup>b*</sup> (21:21)<br>0.069 <sup>b</sup> (10:10) | Baseline                         | 476.4±33.4 (21)<br>479.4±30.8 (10) | 490.6±35.6 (21)<br>481.7±34.9 (10) | 0.190 <sup>a</sup> (21:21)<br>0.878 <sup>a</sup> (10:10)  |
| Week 12                               | 5.61±0.78 (10)                       | 4.85±0.87 (10)                       | 0.054 <sup>a</sup> (10:10)                                | Week 12                          | 462.6±28.2 (10)                    | 464.6±30.9 (10)                    | 0.882 <sup>a</sup> (10:10)                                |
| Change from Baseline to Week 12       | -1.25±0.87 (10)                      | -0.75±1.20 (10)                      | 0.416 <sup>c</sup> (10:10)                                | Change from Baseline to Week 12  | -16.8±19.7 (10)                    | -17.1±14.1 (10)                    | 0.974 <sup>c</sup> (10:10)                                |
| Platelet (x10 <sup>4</sup> counts/μL) |                                      |                                      |                                                           | Hemoglobin (g/dL)                |                                    |                                    |                                                           |
| Baseline                              | 22.8±5.8 (21)<br>23.0±6.9 (10)       | 23.0±5.5 (21)<br>23.2±5.1 (10)       | 0.850 <sup>b</sup> (21:21)<br>0.942 <sup>a</sup> (10:10)  | Baseline                         | 14.7±0.9 (21)<br>14.8±0.8 (10)     | 15.2±0.9 (21)<br>15.1±0.7 (10)     | 0.091 <sup>a</sup> (21:21).<br>0.423 <sup>a</sup> (10:10) |
| Week 12                               | 23.3±5.8 (10)                        | 22.2±2.9 (10)                        | 0.606 <sup>a</sup> (10:10)                                | Week 12                          | 14.4±0.5 (10)                      | 14.5±0.7 (10)                      | 0.555 <sup>a</sup> (10:10)                                |
| Change from Baseline to Week 12       | 0.3±1.9 (10)                         | -1.0±3.0 (10)                        | 0.272 <sup>a</sup> (10:10)                                | Change from Baseline to Week 12  | -0.4±0.6 (10)                      | -0.6±0.3 (10)                      | 0.963 <sup>c</sup> (10:10)                                |
| CRP (mg/dL)                           |                                      |                                      |                                                           | Hematocrit (%)                   |                                    |                                    |                                                           |
| Baseline                              | 0.115±0.162 (21)<br>0.069±0.053 (10) | 0.070±0.059 (21)<br>0.043±0.023 (10) | 0.569 <sup>b</sup> (21:21)<br>0.169 <sup>a</sup> (10:10)  | Baseline                         | 43.8±2.3 (21)<br>43.8±2.0 (10)     | 44.8±2.6 (21)<br>44.4±2.5 (10)     | 0.170 <sup>a</sup> (21:21)<br>0.533 <sup>a</sup> (10:10)  |
| Week 12                               | 0.231±0.506 (10)                     | 0.086±0.106 (10)                     | 0.760 <sup>b</sup> (10:10)                                | Week 12                          | 43.0±1.5 (10)                      | 43.0±2.1 (10)                      | 0.990 <sup>a</sup> (10:10)                                |
| Change from Baseline to Week 12       | 0.162±0.516 (10)                     | 0.043±0.104 (10)                     | 0.344 <sup>c</sup> (10:10)                                | Change from Baseline to Week 12  | -0.8±1.8 (10)                      | -1.4±1.3 (10)                      | 0.558 <sup>c</sup> (10:10)                                |

The numbers in the parentheses indicate the respective sample sizes.

- a. Inter-group comparisons were performed using an unpaired t-test. (no adjustment for baseline).
- b. Inter-group comparisons were performed using the Mann–Whitney *U* test. (no adjustment for baseline).
- c. Inter-group comparisons were performed using ANCOVA for adjusting the baseline

\*P<0.05; \*\*P<0.01; \*\*\*P<0.001

**Supplementary Table 3.**  
**The effect of NMN on clinical laboratory data (blood chemistry).**

|                                 | Placebo Mean±SD                  | NMN Mean±SD                      | p-value                                                  |                                 | Placebo Mean±SD                    | NMN Mean±SD                        | p-value                                                  |
|---------------------------------|----------------------------------|----------------------------------|----------------------------------------------------------|---------------------------------|------------------------------------|------------------------------------|----------------------------------------------------------|
| <b>TP (g/dL)</b>                |                                  |                                  |                                                          | <b>BUN (mg/dL)</b>              |                                    |                                    |                                                          |
| Baseline                        | 7.31±0.38 (21)<br>7.32±0.40 (10) | 7.46±0.31 (21)<br>7.49±0.34 (10) | 0.191 <sup>a</sup> (21:21)<br>0.318 <sup>a</sup> (10:10) | Baseline                        | 14.1±3.07 (21)<br>13.9±3.24 (10)   | 15.1±2.56 (21)<br>14.6±3.18 (10)   | 0.241 <sup>a</sup> (21:21)<br>0.627 <sup>a</sup> (10:10) |
| Week 12                         | 6.90±0.29 (10)                   | 6.98±0.34 (10)                   | 0.576 <sup>a</sup> (10:10)                               | Week 12                         | 13.9±1.92 (10)                     | 13.4±2.49 (10)                     | 0.670 <sup>a</sup> (10:10)                               |
| Change from Baseline to Week 12 | -0.42±0.27 (10)                  | -0.51±0.22 (10)                  | 0.779 <sup>c</sup> (10:10)                               | Change from Baseline to Week 12 | -0.0±2.72 (10)                     | -1.2±2.42 (10)                     | 0.388 <sup>c</sup> (10:10)                               |
| <b>Albumin (g/dL)</b>           |                                  |                                  |                                                          | <b>Creatinine (mg/dL)</b>       |                                    |                                    |                                                          |
| Baseline                        | 4.30±0.23 (21)<br>4.31±0.21 (10) | 4.38±0.22 (21)<br>4.45±0.24 (10) | 0.244 <sup>a</sup> (21:21)<br>0.182 <sup>a</sup> (10:10) | Baseline                        | 0.913±0.12 (21)<br>0.928±0.14 (10) | 0.900±0.14 (21)<br>0.865±0.15 (10) | 0.687 <sup>a</sup> (21:21)<br>0.344 <sup>a</sup> (10:10) |
| Week 12                         | 4.05±0.17 (10)                   | 4.19±0.17 (10)                   | 0.086 <sup>a</sup> (10:10)                               | Week 12                         | 0.950±0.16 (10)                    | 0.870±0.16 (10)                    | 0.253 <sup>a</sup> (10:10)                               |
| Change from Baseline to Week 12 | -0.26±0.13 (10)                  | -0.26±0.16 (10)                  | 0.294 <sup>c</sup> (10:10)                               | Change from Baseline to Week 12 | 0.021±0.05 (10)                    | 0.000±0.03 (10)                    | 0.372 <sup>c</sup> (10:10)                               |
| <b>AST (U/L)</b>                |                                  |                                  |                                                          | <b>Uric acid (mg/dL)</b>        |                                    |                                    |                                                          |
| Baseline                        | 19.6±4.8 (21)<br>19.7±5.0 (10)   | 21.8±4.3 (21)<br>22.4±4.2 (10)   | 0.073 <sup>b</sup> (21:21)<br>0.210 <sup>a</sup> (10:10) | Baseline                        | 6.00±1.26 (21)<br>6.03±1.14 (10)   | 5.36±1.01 (21)<br>5.50±1.04 (10)   | 0.078 <sup>a</sup> (21:21)<br>0.292 <sup>a</sup> (10:10) |
| Week 12                         | 20.1±4.5 (10)                    | 23.8±6.3 (10)                    | 0.148 <sup>a</sup> (10:10)                               | Week 12                         | 6.14±1.09 (10)                     | 5.56±1.24 (10)                     | 0.282 <sup>a</sup> (10:10)                               |
| Change from Baseline to Week 12 | 0.4±2.9 (10)                     | 1.4±4.7 (10)                     | 0.448 <sup>c</sup> (10:10)                               | Change from Baseline to Week 12 | 0.11±0.68 (10)                     | 0.06±0.56 (10)                     | 0.744 <sup>c</sup> (10:10)                               |
| <b>ALT (U/L)</b>                |                                  |                                  |                                                          | <b>Na (mEq/L)</b>               |                                    |                                    |                                                          |
| Baseline                        | 18.0±7.7 (21)<br>18.7±10.2 (10)  | 21.7±8.6 (21)<br>21.8 ±7.0 (10)  | 0.073 <sup>b</sup> (21:21)<br>0.139 <sup>b</sup> (10:10) | Baseline                        | 140.3±1.15 (21)<br>140.0±1.25 (10) | 139.8±1.44 (21)<br>140.3±1.64 (10) | 0.268 <sup>b</sup> (21:21)<br>0.650 <sup>a</sup> (10:10) |
| Week 12                         | 19.1±7.4 (10)                    | 23.6±7.6 (10)                    | 0.197 <sup>a</sup> (10:10)                               | Week 12                         | 140.1±1.37 (10)                    | 139.9±1.37 (10)                    | 0.748 <sup>a</sup> (10:10)                               |
| Change from Baseline to Week 12 | 0.4±6.2 (10)                     | 1.8±5.7 (10)                     | 0.300 <sup>c</sup> (10:10)                               | Change from Baseline to Week 12 | 0.1±0.88 (10)                      | -0.4±1.26 (10)                     | 0.387 <sup>c</sup> (10:10)                               |
| <b>γGTP (U/L)</b>               |                                  |                                  |                                                          | <b>K (mEq/L)</b>                |                                    |                                    |                                                          |
| Baseline                        | 32.4±17.2 (21)<br>31.0±18.9 (10) | 31.4±16.7 (21)<br>37.1±16.6 (10) | 0.840 <sup>b</sup> (21:21)<br>0.384 <sup>b</sup> (10:10) | Baseline                        | 4.28±0.30 (21)<br>4.26±0.17 (10)   | 4.22±0.27 (21)<br>4.16±0.28 (10)   | 0.484 <sup>a</sup> (21:21)<br>0.343 <sup>a</sup> (10:10) |
| Week 12                         | 36.5±32.0 (10)                   | 36.7±13.0 (10)                   | 0.344 <sup>b</sup> (10:10)                               | Week 12                         | 4.34±0.18 (10)                     | 4.31±0.37 (10)                     | 0.821 <sup>a</sup> (10:10)                               |
| Change from Baseline to Week 12 | 5.5±29.9 (10)                    | -0.4±6.8 (10)                    | 0.685 <sup>c</sup> (10:10)                               | Change from Baseline to Week 12 | 0.08±0.24 (10)                     | 0.15±0.31 (10)                     | 0.822 <sup>c</sup> (10:10)                               |

The numbers in the parentheses indicate the respective sample sizes.

- Inter-group comparisons were performed using an unpaired t-test (no adjustment for baseline).
- Inter-group comparisons were performed using the Mann–Whitney *U* test (no adjustment for baseline).
- Inter-group comparisons were performed using ANCOVA for adjusting the baseline

## Supplementary Table 4.

The effect of NMN on whole blood NAD<sup>+</sup> and NAD<sup>+</sup>-related metabolite levels, Related to Figure 2.

### A. Baseline

|                       | Placebo Mean±SD (n)  | NMN Mean±SD (n)      | Between group p-value         |
|-----------------------|----------------------|----------------------|-------------------------------|
| NMN (μM)              | 0.0761±0.0180 (21)   | 0.0750±0.0114 (21)   | 0.746 <sup>b</sup> (21:21)    |
|                       | 0.0768±0.0216 (10)   | 0.0795±0.0102 (10)   | 0.721 <sup>a</sup> (10:10)    |
| NAD <sup>+</sup> (μM) | 0.208±0.081 (21)     | 0.189±0.066 (21)     | 0.419 <sup>a</sup> (21:21)    |
|                       | 0.194±0.081 (10)     | 0.176±0.063 (10)     | 0.588 <sup>a</sup> (10:10)    |
| NR (μM)               | 0.0329±0.0115 (21)   | 0.0344±0.0123 (21)   | 0.672 <sup>b</sup> (21:21)    |
|                       | 0.0291±0.0036 (10)   | 0.0393±0.0152 (10)   | 0.105 <sup>b</sup> (10:10)    |
| NAMN (μM)             | 0.052±0.049 (21)     | 0.091±0.127 (21)     | 0.940 <sup>b</sup> (21:21)    |
|                       | 0.043±0.011 (10)     | 0.150±0.168 (10)     | 0.247 <sup>b</sup> (10:10)    |
| NAR (μM)              | 0.00073±0.00025 (21) | 0.00102±0.00071(21)  | 0.330 <sup>b</sup> (21:21)    |
|                       | 0.00066±0.00014 (10) | 0.00141±0.00088 (10) | 0.009 <sup>b***</sup> (10:10) |
| NA (μM)               | 0.00464±0.00166 (21) | 0.00560±0.00306 (21) | 0.294 <sup>b</sup> (21:21)    |
|                       | 0.00386±0.00100(10)  | 0.00689±0.00381 (10) | 0.012 <sup>*a</sup> (10:10)   |
| NAM (μM)              | 15.5±2.7 (21)        | 17.5±3.2 (21)        | 0.036 <sup>a*</sup> (21:21)   |
|                       | 15.9±2.6 (10)        | 17.8±3.4 (10)        | 0.165 <sup>a</sup> (10:10)    |

### B. 12-week visit

|                       | Placebo Mean±SD (n)  | NMN Mean±SD (n)      | Between group p-value          |
|-----------------------|----------------------|----------------------|--------------------------------|
| NMN (μM)              | 0.105±0.013 (10)     | 0.127±0.019 (10)     | 0.006 <sup>a***</sup> (10:10)  |
| NAD <sup>+</sup> (μM) | 0.53±0.12 (10)       | 1.07±0.16 (10)       | <0.001 <sup>a***</sup> (10:10) |
| NR (μM)               | 0.0308±0.0088 (10)   | 0.0549±0.0241 (10)   | 0.002 <sup>b***</sup> (10:10)  |
| NAMN (μM)             | 0.05±0.03 (10)       | 3.51±1.86 (10)       | <0.001 <sup>b***</sup> (10:10) |
| NAR (μM)              | 0.00073±0.00016 (10) | 0.00940±0.00464 (10) | <0.001 <sup>b***</sup> (10:10) |
| NA (μM)               | 0.00684±0.00168 (10) | 0.00974±0.00129 (10) | <0.001 <sup>a***</sup> (10:10) |
| NAM (μM)              | 10.6±1.6 (10)        | 13.4±2.4 (10)        | 0.006 <sup>a***</sup> (10:10)  |

The numbers in the parentheses indicate the respective sample sizes.

NMN: nicotinamide mononucleotide, NAD<sup>+</sup>: nicotinamide adenine dinucleotide, NR: nicotinamide riboside, NAMN: nicotinic acid mononucleotide, NAR: nicotinic acid riboside, NA: nicotinic acid, NAM: nicotinamide

a. Inter-group comparisons were performed using an unpaired t-test.

b. Inter-group comparisons were performed using the Mann–Whitney *U* test.

\*P<0.05; \*\*P<0.01; \*\*\*P<0.001

**Supplementary Table 5.**  
**NMN supplementation does not affect metabolic parameters, Related to Figure 3.**

|                                 | Placebo Mean±SD                    | NMN Mean±SD                        | p-value                                                  |                                 | Placebo Mean±SD                  | NMN Mean±SD                      | p-value                                                       |
|---------------------------------|------------------------------------|------------------------------------|----------------------------------------------------------|---------------------------------|----------------------------------|----------------------------------|---------------------------------------------------------------|
| <b>Triglycerides (mg/dL)</b>    |                                    |                                    |                                                          | <b>HDL Cholesterol (mg/dL)</b>  |                                  |                                  |                                                               |
| Baseline                        | 114.6±49.5 (21)<br>102.2±44.9 (10) | 116.5±42.4 (21)<br>116.7±36.8 (10) | 0.897 <sup>a</sup> (21:21)<br>0.440 <sup>a</sup> (10:10) | Baseline                        | 62.8±14.1 (21)<br>61.1±15.2 (10) | 61.6±17.4 (21)<br>67.3±17.9 (10) | 0.803 <sup>a</sup> (21:21)<br>0.422 <sup>a</sup> (10:10)      |
| Week 12                         | 82.4±36.8 (10)                     | 107.6±37.0 (10)                    | 0.045 <sup>b*</sup> (10:10)                              | Week 12                         | 58.7±15.2 (10)                   | 62.1±16.4 (10)                   | 0.635 <sup>a</sup> (10:10)                                    |
| Change from Baseline to Week 12 | -19.8± 26.3 (10)                   | -9.1±14.2 (10)                     | 0.133 <sup>c</sup> (10:10)                               | Change from Baseline to Week 12 | -2.5±4.2 (10)                    | -5.2±3.9 (10)                    | 0.233 <sup>c</sup> (10:10)                                    |
| <b>LDL Cholesterol (mg/dL)</b>  |                                    |                                    |                                                          | <b>Interleukin-6 (pg/mL)</b>    |                                  |                                  |                                                               |
| Baseline                        | 134.4±26.5 (21)<br>132.2±18.0 (10) | 125.7±36.8 (21)<br>125.4±32.3 (10) | 0.386 <sup>a</sup> (21:21)<br>0.568 <sup>a</sup> (10:10) | Baseline                        | 1.66±0.62 (21)<br>1.78±0.68 (10) | 1.29±0.75 (21)<br>0.90±0.37 (10) | 0.031 <sup>b*</sup> (21:21)<br><0.001 <sup>b***</sup> (10:10) |
| Week 12                         | 121.8±17.0 (10)                    | 109.0±36.8 (10)                    | 0.331 <sup>a</sup> (10:10)                               | Week 12                         | 1.50±0.62 (10)                   | 1.39±0.81 (10)                   | 0.403 <sup>b</sup> (10:10)                                    |
| Change from Baseline to Week 12 | -10.4±14.5 (10)                    | -16.4±10.3 (10)                    | 0.311 <sup>c</sup> (10:10)                               | Change from Baseline to Week 12 | -0.28±0.94 (10)                  | 0.49±0.67 (10)                   | 0.762 <sup>c</sup> (10:10)                                    |
| <b>Adiponectin (µg/mL)</b>      |                                    |                                    |                                                          |                                 |                                  |                                  |                                                               |
| Baseline                        | 8.59±2.70 (21)<br>8.97±2.90 (10)   | 8.95±4.91 (21)<br>8.32±3.59 (10)   | 0.458 <sup>b</sup> (21:21)<br>0.661 <sup>a</sup> (10:10) |                                 |                                  |                                  |                                                               |
| Week 12                         | 8.76±2.93 (10)                     | 8.35±3.50 (10)                     | 0.780 <sup>a</sup> (10:10)                               |                                 |                                  |                                  |                                                               |
| Change from Baseline to Week 12 | -0.21±0.87 (10)                    | 0.03±1.15 (10)                     | 0.669 <sup>c</sup> (10:10)                               |                                 |                                  |                                  |                                                               |

The numbers in the parentheses indicate the respective sample sizes.

- a. Inter-group comparisons were performed using an unpaired t-test (no adjustment for baseline).
- b. Inter-group comparisons were performed using the Mann–Whitney *U* test (no adjustment for baseline).
- c. Inter-group comparisons were performed using ANCOVA for adjusting the baseline

\*P<0.05

## Supplementary Table 6.

### The effect of NMN on auditory and cognitive functions

|                                                  | Placebo Mean±SD                  | NMN Mean±SD                      | p-value                                                  |                                                | Placebo Mean±SD                  | NMN Mean±SD                      | p-value                                                    |
|--------------------------------------------------|----------------------------------|----------------------------------|----------------------------------------------------------|------------------------------------------------|----------------------------------|----------------------------------|------------------------------------------------------------|
| Hearing Testing (Right/dB) p= 0.054 <sup>b</sup> |                                  |                                  |                                                          | Hearing Testing (Left/dB) p=0.636 <sup>b</sup> |                                  |                                  |                                                            |
| Baseline                                         | 23.8±12.2 (21)<br>18.1±9.7 (10)  | 27.2±14.0 (21)<br>25.9±10.0 (10) | 0.512 <sup>d</sup> (21:21)<br>0.095 <sup>c</sup> (10:10) | Baseline                                       | 21.6±8.6 (21)<br>18.2±9.2 (10)   | 30.9±16.6 (21)<br>30.4±14.5 (10) | 0.072 <sup>d</sup> . (21:21)<br>0.045 <sup>d</sup> (10:10) |
| Week 6                                           | 24.6±13.0 (21)<br>19.3±9.6 (10)  | 27.6±14.3 (21)<br>26.2±10.5 (10) | 0.504 <sup>d</sup> (21:21)<br>0.146 <sup>c</sup> (10:10) | Week 6                                         | 21.9±9.1 (21)<br>18.8±10.0 (10)  | 31.5±16.6 (21)<br>29.9±13.6 (10) | 0.051 <sup>d</sup> . (21:21)<br>0.045 <sup>d</sup> (10:10) |
| Week 12                                          | 20.3±10.2 (10)                   | 25.8±9.6 (10)                    | 0.229 <sup>c</sup> (10:10)                               | Week 12                                        | 19.3±9.0 (10)                    | 31.0±13.5 (10)                   | 0.019 <sup>d*</sup> (10:10)                                |
| Change from Baseline to Week 6                   | 0.8±2.7 (21)                     | 0.4±3.1 (21)                     | 0.610 <sup>e</sup> (21:21)<br>0.574 <sup>e</sup> (10:10) | Change from Baseline to Week 6                 | 0.3±3.8 (21)<br>0.6±2.3 (10)     | 0.7±3.9 (21)<br>-0.5±4.6 (10)    | 0.617 <sup>e</sup> (21:21)<br>0.820 <sup>e</sup> (10:10)   |
| Change from Baseline to Week 12                  | 2.1±2.7 (10)                     | -0.1±2.2 (10)                    | 0.117 <sup>e</sup> (10:10)                               | Change from Baseline to Week 12                | 1.1± 2.4 (10)                    | 0.6±3.0 (10)                     | 0.766 <sup>e</sup> (10:10)                                 |
| MMSE-J (score)                                   |                                  |                                  |                                                          | MOCA-J (score)                                 |                                  |                                  |                                                            |
| Baseline                                         | 27.9±1.64 (21)<br>27.9±0.88 (10) | 27.9±2.15 (21)<br>28.3±1.49 (10) | 0.768 <sup>d</sup> (21:21)<br>0.475 <sup>c</sup> (10:10) | Baseline                                       | 24.9±2.49 (21)<br>25.7±1.49 (10) | 24.9±2.43 (21)<br>25.7±2.54 (10) | 1.000 <sup>c</sup> (21:21)<br>1.000 <sup>c</sup> (10:10)   |
| Week 12                                          | 28.9±1.10 (10)                   | 28.3±1.64 (10)                   | 0.401 <sup>d</sup> (10:10)                               | Week 12                                        | 26.0±2.00 (10)                   | 26.2±1.48 (10)                   | 0.802 <sup>c</sup> (10:10)                                 |
| Change from Baseline to Week 12                  | 1.0±1.33 (10)                    | 0.0±1.63 (10)                    | 0.227 <sup>e</sup> (10:10)                               | Change from Baseline to Week 12                | 0.3±2.11 (10)                    | 0.5±2.27 (10)                    | 0.794 <sup>e</sup> (10:10)                                 |

The numbers in the parentheses indicate the respective sample sizes.

- Treatment was compared using a mixed model analysis. The p-value denotes interaction.
- Treatment was compared using MMRM. p-value denotes interaction.
- Inter-group comparisons were performed using an unpaired t-test (no adjustment for baseline).
- Inter-group comparisons were performed using the Mann–Whitney *U* test (no adjustment for baseline).
- Inter-group comparisons were performed using ANCOVA for adjusting the baseline.

\*P<0.05

**Supplementary Table 7. The effect of NMN on BMI and vascular function**

|                                                                      | Placebo Mean±SD                   | NMN Mean±SD                        | p-value                                                  |                                                                            | Placebo Mean±SD                    | NMN Mean±SD                        | p-value                                                  |
|----------------------------------------------------------------------|-----------------------------------|------------------------------------|----------------------------------------------------------|----------------------------------------------------------------------------|------------------------------------|------------------------------------|----------------------------------------------------------|
| BMI (kg/m <sup>2</sup> ) p=0.341 <sup>a</sup> , p=0.851 <sup>b</sup> |                                   |                                    |                                                          | Systolic Blood Pressure (mmHg) p=0.982 <sup>a</sup> , p=0.438 <sup>b</sup> |                                    |                                    |                                                          |
| Baseline                                                             | 24.5±1.4 (21)<br>24.8±1.2(10)     | 24.1±1.4 (21)<br>23.7±1.3(10)      | 0.283 <sup>d</sup> (21:21)<br>0.063 <sup>c</sup> (10:10) | Baseline                                                                   | 130.7±19.8 (21)<br>127.0±18.2 (10) | 129.5±15.3 (21)<br>135.9±18.9(10)  | 0.950 <sup>d</sup> (21:21)<br>0.298 <sup>c</sup> (10:10) |
| Week 6                                                               | 24.4±1.3 (21)<br>24.7±1.2 (10)    | 24.0±1.4 (21)<br>23.6± 1.2(10)     | 0.283 <sup>d</sup> (21:21)<br>0.044 <sup>c</sup> (10:10) | Week 6                                                                     | 126.1±19.4 (21)<br>125.2±21.3 (10) | 129.2±16.1 (21)<br>136.5±20.0 (10) | 0.577 <sup>c</sup> (21:21)<br>0.237 <sup>c</sup> (10:10) |
| Week 12                                                              | 24.6±1.2 (10)                     | 23.5±1.2 (10)                      | 0.664 <sup>c</sup> (10:10)                               | Week 12                                                                    | 128.8±20.5 (10)                    | 131.7±25.1 (10)                    | 0.781 <sup>c</sup> (10:10)                               |
| Change from Baseline to Week 6                                       | -0.1±0.3 (21)<br>-0.1±0.3(10)     | -0.1±0.2 (21)<br>-0.1±0.3 (10)     | 0.752 <sup>c</sup> (21:21)<br>0.377 <sup>e</sup> (10:10) | Change from Baseline to Week 6                                             | -4.6±12.0 (21)<br>-1.8±10.5 (10)   | -0.2±7.8 (21)<br>0.6 ±7.2 (10)     | 0.182 <sup>e</sup> (21:21)<br>0.584 <sup>e</sup> (10:10) |
| Change from Baseline to Week 12                                      | -0.3±0.4 (10)                     | -0.3±0.45 (10)                     | 0.830 <sup>e</sup> (10:10)                               | Change from Baseline to Week 12                                            | 1.8±13.0 (10)                      | -4.2±13.0 (10)                     | 0.333 <sup>e</sup> (10:10)                               |
| Flow Mediated Dilation (%) p=0.839 <sup>b</sup>                      |                                   |                                    |                                                          | Diastolic blood pressure(mmHg) p=0.306 <sup>b</sup>                        |                                    |                                    |                                                          |
| Baseline                                                             | 4.00±1.56 (21)<br>3.97±1.91 (10)  | 4.09±1.52 (21)<br>4.10±1.32 (10)   | 0.850 <sup>c</sup> (21:21)<br>0.861 <sup>c</sup> (10:10) | Baseline                                                                   | 79.9±9.4 (21)<br>81.2±10.9(10)     | 81.3±11.8 (21)<br>85.2±13.6 (10)   | 0.632 <sup>d</sup> (21:21)<br>0.477 <sup>c</sup> (10:10) |
| Week 6                                                               | 3.80±1.93 (21)<br>4.01±2.53 (10)  | 3.84±1.79 (21)<br>3.25±1.76 (10)   | 0.941 <sup>c</sup> (21:21)<br>0.446 <sup>c</sup> (10:10) | Week 6                                                                     | 81.4±12.2 (21)<br>80.8±11.9 (10)   | 82.6±11.2 (21)<br>86.9±12.7 (10)   | 0.744 <sup>c</sup> (21:21)<br>0.283 <sup>c</sup> (10:10) |
| Week 12                                                              | 3.77±1.38 (10)                    | 3.85±1.35 (10)                     | 0.897 <sup>c</sup> (10:10)                               | Week 12                                                                    | 81.2±8.9 (10)                      | 81.7±11.0 (10)                     | 0.912 <sup>c</sup> (10:10)                               |
| Change from Baseline to Week 6                                       | -0.20±1.46 (21)<br>0.04±1.72 (10) | -0.24±2.25 (21)<br>-0.85±1.91 (10) | 0.936 <sup>c</sup> (21:21)<br>0.308 <sup>e</sup> (10:10) | Change from Baseline to Week 6                                             | 1.5±7.3 (21)<br>-0.4±4.9 (10)      | 1.3±4.6 (21)<br>1.7±4.6 (10)       | 0.955 <sup>e</sup> (21:21)<br>0.287 <sup>e</sup> (10:10) |
| Change from Baseline to Week 12                                      | -0.20±2.10 (10)                   | -0.25±1.72 (10)                    | 0.925 <sup>e</sup> (10:10)                               | Change from Baseline to Week 12                                            | 0.0±6.6 (10)                       | -3.5±8.1 (10)                      | 0.464 <sup>e</sup> (10:10)                               |

The numbers in the parentheses indicate the respective sample sizes.

- Treatment was compared using a mixed model analysis. The p-value denotes interaction.
- Treatment was compared using MMRM. The p-value denotes interaction.
- Inter-group comparisons were performed using an unpaired t-test (no adjustment for baseline).
- Inter-group comparisons were performed using the Mann–Whitney *U* test (no adjustment for baseline).
- Inter-group comparisons were performed using ANCOVA for adjusting the baseline.

**Supplementary Table 1. Clinical characteristics of the 20 study participants who completed the 12-week study prior to NMN supplementation, Related to Table 1.**

The mean and standard deviation of data from 20 participants (from the NMN group (n = 10) and placebo group (n = 10)) are presented.

- a. Inter-group comparisons were performed using an unpaired *t*-test.
- b. Inter-group comparisons were performed using the Mann–Whitney *U* test.

\*P<0.05

**Supplementary Table 2. The effect of NMN on clinical laboratory data (hematology and CRP).**

The numbers in the parentheses indicate the respective sample sizes.

- a. Inter-group comparisons were performed using an unpaired *t*-test (no adjustment for baseline).
- b. Inter-group comparisons were performed using the Mann–Whitney *U* test (no adjustment for baseline).



c. Inter-group comparisons were performed using ANCOVA for adjusting the baseline.

\*P<0.05

**Supplementary Table 3. The effect of NMN on clinical laboratory data (blood chemistry).**

The numbers in the parentheses indicate the respective sample sizes.

a. Inter-group comparisons were performed using an unpaired *t*-test (no adjustment for baseline).

b. Inter-group comparisons were performed using the Mann–Whitney *U* test (no adjustment for baseline).

c. Inter-group comparisons were performed using ANCOVA for adjusting the baseline.

\*P<0.05

**Supplementary Table 4.**

**The effect of NMN on whole blood NAD<sup>+</sup> and NAD<sup>+</sup>-related metabolite levels,  
Related to Figure 2.**

The numbers in the parentheses indicate the respective sample sizes.

NMN: nicotinamide mononucleotide, NAD<sup>+</sup>: nicotinamide adenine dinucleotide, NR: nicotinamide riboside, NAMN: nicotinic acid mononucleotide, NAR: nicotinic acid riboside, NA: nicotinic acid. NAM: nicotinamide

- a. Inter-group comparisons were performed using an unpaired *t*-test.
- b. Inter-group comparisons were performed using the Mann–Whitney *U* test.

\**P*<0.05; \*\**P*<0.01; \*\*\**P*<0.001

**Supplementary Table 5. NMN supplementation does not affect metabolic parameters, Related to Figure 3.**

The numbers in the parentheses indicate the respective sample sizes.

- a. Inter-group comparisons were performed using an unpaired *t*-test (no adjustment for baseline).

b. Inter-group comparisons were performed using the Mann–Whitney *U* test (no adjustment for baseline).

c. Inter-group comparisons were performed using ANCOVA for adjusting the baseline.

\* $P < 0.05$

**Supplementary Table 6. The effect of NMN on auditory and cognitive functions.**

The numbers in the parentheses indicate the respective sample sizes.

a. Treatment was compared using a mixed model analysis. The p-value denotes interaction.

b. Treatment was compared using MMRM. The p-value denotes interaction.

c. Inter-group comparisons were performed using an unpaired *t*-test (no adjustment for baseline).

d. Inter-group comparisons were performed using the Mann–Whitney *U* test (no adjustment for baseline).

e. Inter-group comparisons were performed using ANCOVA for adjusting the baseline.

\*P<0.05

**Supplementary Table 7. The effect of NMN on vascular function.**

The numbers in the parentheses indicate the respective sample sizes.

- a. Treatment was compared using a mixed model analysis. The p-value denotes interaction.
- b. Treatment was compared using MMRM. The p-value denotes interaction.
- c. Inter-group comparisons were performed using an unpaired *t*-test (no adjustment for baseline).
- d. Inter-group comparisons were performed using the Mann–Whitney *U* test (no adjustment for baseline).
- e. Inter-group comparisons were performed using ANCOVA for adjusting the baseline.
